# Supplementary material
Source: Royal Society of Chemistry journal article supplement (doi:10.1039/d5nj04191k)
Supplement: d5nj04191k1.pdf [file d5nj04191k1.pdf]

## Supporting Information

### Fluoride-Free Synthesis of Surface-Modulated MXene via Molten Salt Etching for High-Performance Sodium-Ion Batteries

Junru Wu <sup>a</sup>, Guoxu Ni<sup>b</sup>, Qihong Cui <sup>b, \*</sup>

<sup>a</sup> School of Mathematics and Computer, Guangdong Ocean University, Zhanjiang 524088, China

<sup>b</sup> Department of Materials Science and Engineering, School of Physical Sciences and Engineering, Beijing Jiaotong University, Beijing 100044, China.

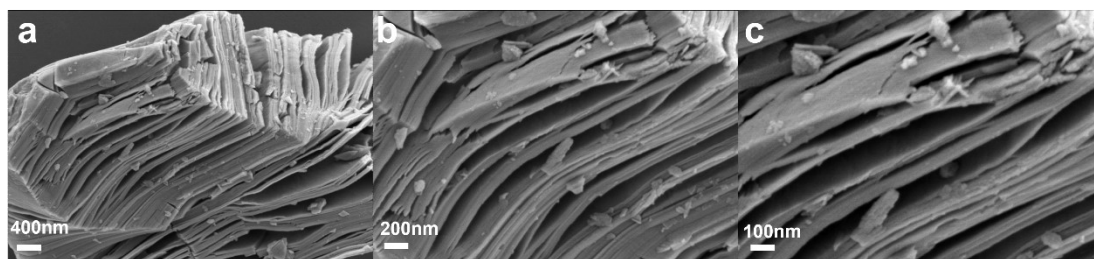

Figure. S1. SEM images of MXene-HF.

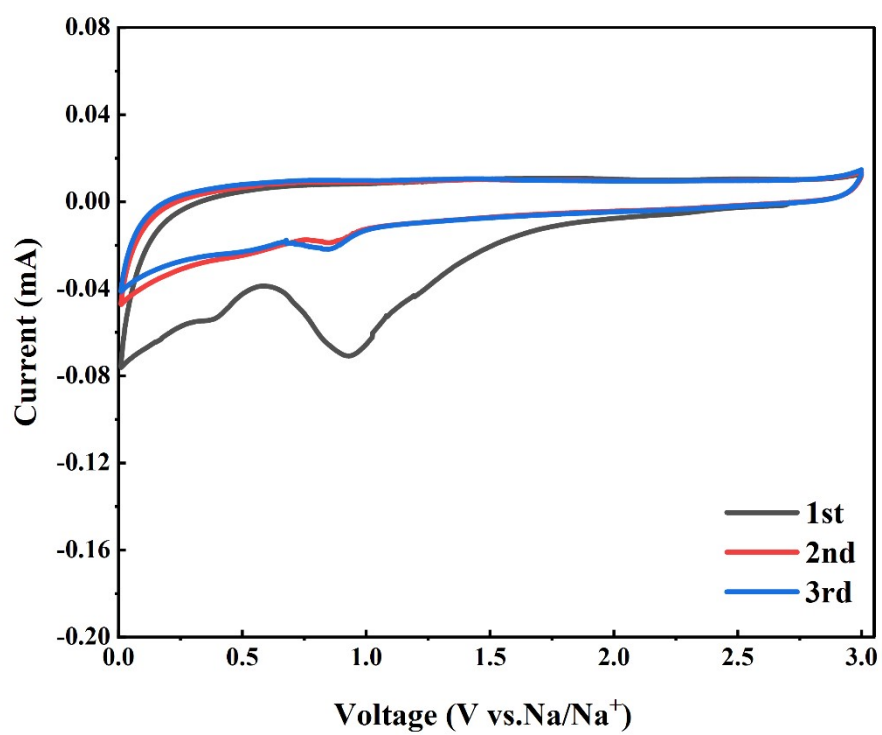

Figure. S2. CV curves of MXene-HF.

| Element | Atomic Percentage (%) |
|---------|-----------------------|
|         |                       |

|    |       |
|----|-------|
| Nb | 39.45 |
| C  | 30.10 |
| O  | 14.43 |
| S  | 6.94  |
| Fe | 9.08  |

Table. S1. Atomic percentages from XPS

| Material                                              | Reversible Capacity<br>(mAh·g <sup>-1</sup> ) | Rate Capability<br>(mAh·g <sup>-1</sup> ) | Cycling Stability                              | Ref.                                    |
|-------------------------------------------------------|-----------------------------------------------|-------------------------------------------|------------------------------------------------|-----------------------------------------|
| S-MX (this work)                                      | 320 at 0.1 A·g <sup>-1</sup>                  | 137.2 at 5 A·g <sup>-1</sup>              | 98.8 after 100 cycles at 0.5 A·g <sup>-1</sup> | This work                               |
| HF-etched Nb <sub>2</sub> C                           | ~60 at 0.05 A·g <sup>-1</sup>                 | ~12.6 at 5 A·g <sup>-1</sup>              | ~11.8 after 100 cycles                         | This work (control)                     |
| HF-etched Ti <sub>3</sub> C <sub>2</sub>              | 51 at 0.05 A·g <sup>-1</sup>                  | ~50 at 1 A·g <sup>-1</sup>                | ~80 after 500 cycles                           | <i>New J. Chem.</i> , 2023, 47, 6540    |
| Cl-terminated Ti <sub>3</sub> C <sub>2</sub> (molten) | ~150 at 0.1 A·g <sup>-1</sup>                 | ~97 at 1 A·g <sup>-1</sup>                | ~70 after 200 cycles                           | <i>Adv. Energy Mater.</i> <b>2022</b> , |

| Material | Reversible Capacity<br>(mAh·g <sup>-1</sup> ) | Rate Capability<br>(mAh·g <sup>-1</sup> ) | Cycling Stability | Ref.        |
|----------|-----------------------------------------------|-------------------------------------------|-------------------|-------------|
| salt)    |                                               |                                           |                   | 12, 2202052 |

Table. S2. Comparison with Reported MXene-Based Anodes.
